# Supplementary material for: Association of physical activity with chronic kidney disease: a systematic review and dose-response meta-analysis
Source: publisher site journal article supplement (doi:10.18632/aging.103747), 2020-10-05
Supplement: Supplementary file [file aging-v12i19-103747-supplementary-material-SD2.pdf]

## SUPPLEMENTARY TABLES

**Supplementary Table 2. Quality assessment of cohort studies.**

| Author, year       | NOS                                      |                                     |                            |                                                                          |                                                                                            |                       |                                                 |                                 | Total |
|--------------------|------------------------------------------|-------------------------------------|----------------------------|--------------------------------------------------------------------------|--------------------------------------------------------------------------------------------|-----------------------|-------------------------------------------------|---------------------------------|-------|
|                    | Selection                                |                                     |                            | Comparability                                                            |                                                                                            |                       | Outcome                                         |                                 |       |
|                    | Representativeness of the exposed cohort | Selection of the non-exposed cohort | Ascertainment of exposures | Demonstration that outcome of interest was not present at start of study | Comparability of cohorts on the basis of the design or analysis controlled for confounders | Assessment of outcome | Was follow up long enough for outcomes to occur | Adequacy of follow up of cohort |       |
| White, 2011 [1]    | 1                                        | 1                                   | 1                          | 1                                                                        | 1                                                                                          | 1                     | 1                                               | 1                               | 8     |
| Wakasugi, 2012 [2] | 0                                        | 1                                   | 0                          | 1                                                                        | 1                                                                                          | 1                     | 1                                               | 1                               | 6     |
| Lin, 2014 [3]      | 1                                        | 1                                   | 1                          | 1                                                                        | 1                                                                                          | 1                     | 1                                               | 0                               | 7     |
| Jafar, 2015 [4]    | 1                                        | 1                                   | 1                          | 1                                                                        | 1                                                                                          | 1                     | 1                                               | 1                               | 8     |
| Hawkins, 2016 [5]  | 0                                        | 1                                   | 1                          | 0                                                                        | 1                                                                                          | 1                     | 1                                               | 1                               | 6     |
| Guo, 2020 [6]      | 1                                        | 1                                   | 1                          | 1                                                                        | 1                                                                                          | 1                     | 1                                               | 1                               | 8     |

NOS: Newcastle–Ottawa Scale.

**Supplementary Table 3. Quality assessment of cross-sectional studies.**

| Author, year          | Were the criteria for inclusion in the sample clearly defined | Were the study subjects and the setting described in detail | Was the exposure measured in a valid and reliable way | Were objective, standard criteria used for measurement of the condition | Were confounding factors identified | Were strategies to deal with confounding factors stated | Were the outcomes measured in a valid and reliable way | Was appropriate statistical analysis used |
|-----------------------|---------------------------------------------------------------|-------------------------------------------------------------|-------------------------------------------------------|-------------------------------------------------------------------------|-------------------------------------|---------------------------------------------------------|--------------------------------------------------------|-------------------------------------------|
| Hallan, 2006 [7]      | Yes                                                           | Yes                                                         | No                                                    | No                                                                      | Yes                                 | Yes                                                     | Yes                                                    | Yes                                       |
| Bharakhada, 2012 [8]  | Yes                                                           | Yes                                                         | Yes                                                   | Yes                                                                     | Yes                                 | Yes                                                     | Yes                                                    | Yes                                       |
| Lee, 2013 [9]         | Yes                                                           | Yes                                                         | Yes                                                   | Yes                                                                     | Yes                                 | Yes                                                     | Yes                                                    | Yes                                       |
| Chudek, 2014 [10]     | Yes                                                           | Yes                                                         | No                                                    | No                                                                      | Yes                                 | Yes                                                     | Yes                                                    | Yes                                       |
| Michishita, 2016 [11] | Yes                                                           | Yes                                                         | Yes                                                   | Yes                                                                     | Yes                                 | Yes                                                     | Yes                                                    | Yes                                       |
| Alkerwi, 2017 [12]    | Yes                                                           | Yes                                                         | Yes                                                   | Yes                                                                     | Yes                                 | Yes                                                     | Yes                                                    | Yes                                       |
| Inoue, 2017 [13]      | Yes                                                           | Yes                                                         | No                                                    | No                                                                      | Yes                                 | Yes                                                     | Yes                                                    | Yes                                       |

JBI-MAStARI: Joanna Briggs Institute Meta-Analysis of Statistics Assessment and Review Instrument.
